# Supplementary material
Source: publisher site journal article supplement (https://www.spandidos-publications.com/5134/downloadSupplementary)

Figure S1. Representative photomicrographs of normal human organ sections of Fig. 2A that were negative for ZFPL1-immunopositive cell populations. The sections were first processed for ZFPL1 immunofluorescence (red) and then counterstained for DAPI (71). ZFPL1, zinc finger protein like 1.

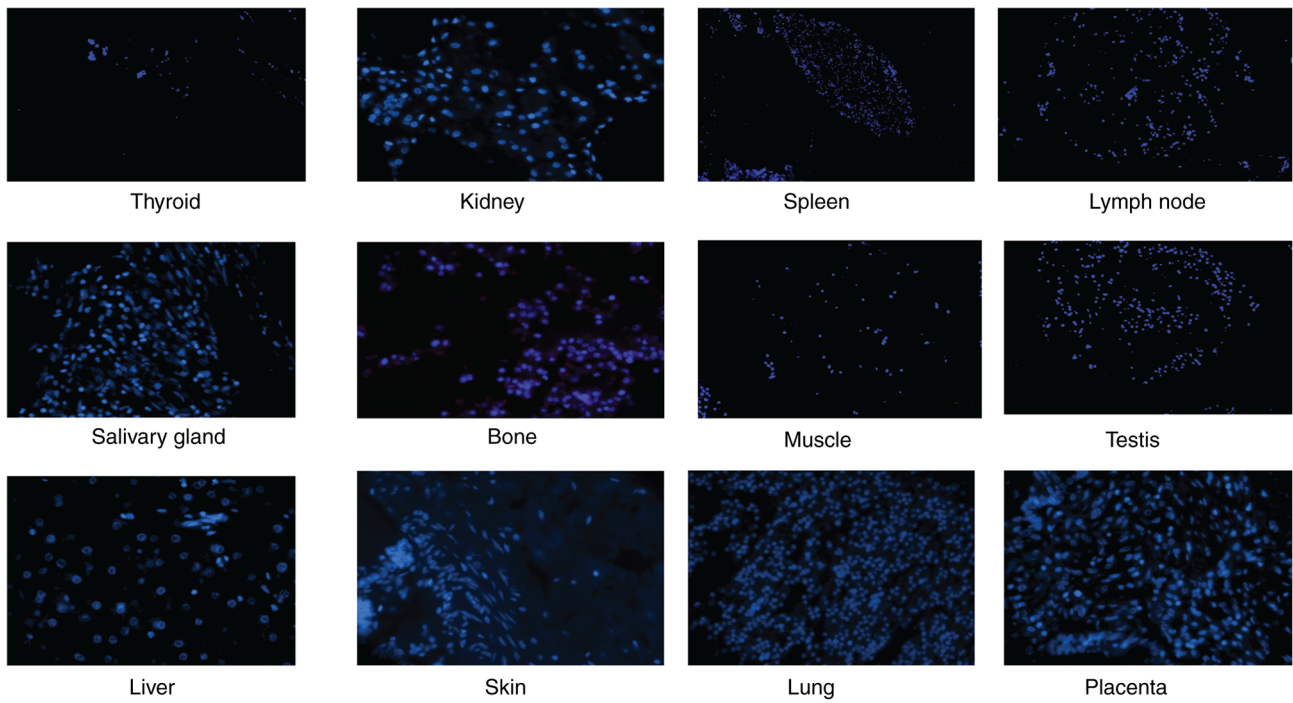

Supplement: Supplementary file 1 [file downloadSupplementary]
